# Supplementary material for: Cu–Mg synergy enhanced synthesis of methyl formate over noble metal-free heterogeneous catalyst systems
Source: Royal Society of Chemistry journal article supplement (doi:10.1039/d4su00478g), 2024-01-01
Supplement: d4su00478g1.pdf [file d4su00478g1.pdf]

Supporting Information

**Cu-Mg synergy enhanced synthesis of methyl formate over noble metal-free heterogeneous catalyst system**

Jyotishman Kaishyop<sup>a,b</sup>, Arpan Mukherjee<sup>a</sup>, Abhay Giri Goswami<sup>c</sup>, Tuhin Suvra Khan<sup>b,d</sup>,  
Ankur Bordoloi<sup>a,b,\*</sup>

a. Nanocatalyst area, Light Stock Processing Division, CSIR-Indian Institute of Petroleum, Dehradun 248005, Uttarakhand, India

b. Academy of Scientific and Innovative Research (AcSIR), Ghaziabad, 201002, India

c. Department of Chemistry, IIT Gandhinagar, Palaj, Gujarat 382355

d. Climate Change and Data Science Division, CSIR-Indian Institute of Petroleum, Dehradun 248005, Uttarakhand, India

Corresponding author

Email Address: [ankurb@iip.res.in](mailto:ankurb@iip.res.in) (A. Bordoloi)

## Table of Contents

|                  |                                                                                                                                                                  |   |
|------------------|------------------------------------------------------------------------------------------------------------------------------------------------------------------|---|
| <b>Table S1</b>  | The surface and bulk composition of elements determined by XPS and ICP-MS analysis                                                                               | 3 |
| <b>Table S2</b>  | CO <sub>2</sub> desorption data of the catalysts obtained from CO <sub>2</sub> -TPD and surface properties collected from N <sub>2</sub> -physisorption analysis | 3 |
| <b>Figure S1</b> | GC chromatogram for 5%Cu-20%MgO-ZrO <sub>2</sub> catalyst (a) before reaction (at time: 0h) and (b) after reaction (at time: 2h)                                 | 4 |
| <b>Table S3</b>  | Chromatogram data obtained from GC-Thermal conductivity detector (Model: Agilent 7890B) for the catalyst 5%Cu-20%MgO-ZrO <sub>2</sub>                            | 4 |

**Table S1:** The surface and bulk composition of elements determined by XPS and ICP-MS analysis

| Entry | Catalysts | Surface composition (%) |       |       | Bulk composition (%) |       |       |
|-------|-----------|-------------------------|-------|-------|----------------------|-------|-------|
|       |           | XPS Analysis            |       |       | ICP-AES Analysis     |       |       |
|       |           | Cu                      | Mg    | Zr    | Cu                   | Mg    | Zr    |
| 1     | Z         | -                       | -     | 23.94 | -                    | -     | 35.15 |
| 2     | 20MZ      | -                       | 17.76 | 22.79 | -                    | 19.78 | 33.29 |
| 3     | 5C-20MZ   | 1.01                    | 15.19 | 23.55 | 4.91                 | 19.72 | 32.68 |

**Table S2:** CO<sub>2</sub> desorption data of the catalysts obtained from CO<sub>2</sub>-TPD and surface properties collected from N<sub>2</sub>-physisorption analysis

| Entry | Catalysts | CO <sub>2</sub> desorbed (cm <sup>3</sup> /g STP) |        |        |        | S <sub>BET</sub> (m <sup>2</sup> /g) | PD (nm) | PV (cm <sup>3</sup> /g) |
|-------|-----------|---------------------------------------------------|--------|--------|--------|--------------------------------------|---------|-------------------------|
|       |           | Weak                                              | Medium | Strong | Total  |                                      |         |                         |
| 1     | Z         | -                                                 | 0.7428 | -      | 0.7428 | 78                                   | 11.8    | 0.3                     |
| 2     | 20MZ      | 0.8057                                            | 0.3855 |        | 1.1912 | 66                                   | 9.9     | 0.2                     |
| 3     | 5C-20MZ   | 0.8122                                            | 0.6212 | 0.1165 | 1.5499 | 61                                   | 9.4     | 0.2                     |

\*S<sub>BET</sub>: BET Surface area, PD: Pore diameter, PV: Pore volume

## GC Chromatogram

### (a) Before reaction

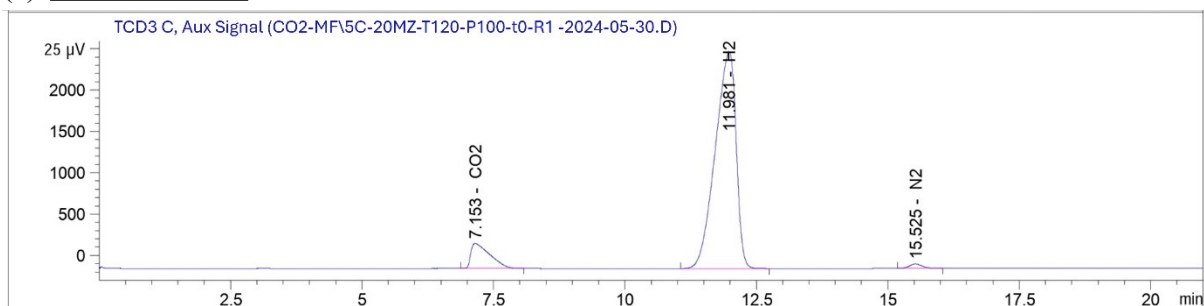

### (b) After reaction

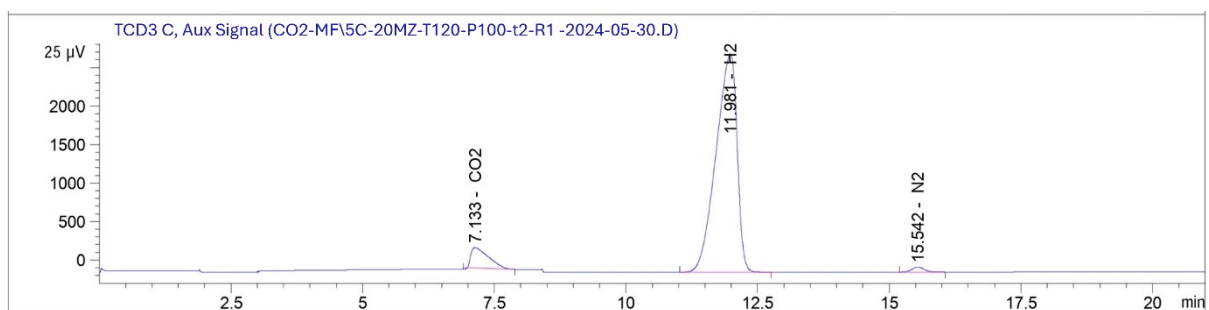

**Figure S1:** GC chromatogram for 5%Cu-20%MgO-ZrO<sub>2</sub> catalyst (a) before reaction (at time: 0h) and (b) after reaction (at time: 2h)

**Table S3:** Chromatogram data obtained from GC-Thermal conductivity detector (Model: Agilent 7890B) for the catalyst 5%Cu-20%MgO-ZrO<sub>2</sub>

| Before reaction      |               |                                       |        | After reaction       |               |                                       |        |
|----------------------|---------------|---------------------------------------|--------|----------------------|---------------|---------------------------------------|--------|
| Retention time [min] | Compound      | Area [25 $\mu\text{V}\cdot\text{s}$ ] | Norm % | Retention time [min] | Compound      | Area [25 $\mu\text{V}\cdot\text{s}$ ] | Norm % |
| 7.153                | $\text{CO}_2$ | 7519.4                                | 46.07  | 7.133                | $\text{CO}_2$ | 6465.9                                | 39.62  |
| 11.981               | $\text{H}_2$  | 72225                                 | 49.86  | 11.981               | $\text{H}_2$  | 62113.5                               | 42.88  |
| 15.525               | $\text{N}_2$  | 887.33                                | 4.06   | 15.542               | $\text{N}_2$  | 1051.64                               | 4.81   |
